# Supplementary material
Source: Research Square preprint supplement (doi:10.21203/rs.3.rs-9701933/v1)
Supplement: Supplementary file 1 [file 96fccd7378ab936c8de1fae6.docx]

Vocabulary

ECTS European credit transfer and accumulation system.

EMS Emergency medical services.

EMT Emergency medical technician. Medical professional who usually works in an ambulance and has training in basic life support. Can be compared to “basic level personnel” in the Finnish EMS system

Paramedic Healthcare professional trained in emergency medicine. Has training in advanced life support and can be compared to “advanced level personnel” in the Finnish EMS system.

Prehospital Care that precedes hospital

PTSD post-traumatic stress disorder.

PTSS post-traumatic stress symptoms.
